# Supplementary material
Source: PubMed Central journal article supplement (PMC3039366)
Supplement: supp_M110.182733_jbc.M110.182733-1.pdf [file supp_M110.182733_jbc.M110.182733-1.pdf]

## Supplementary Figure Legends:

### Fig S-1. Ablation of *E2f1-3* does not affect erythroid or lymphoid lineages in BM.

Cells isolated from femur of mice of indicated genotypes stained with lineage markers Ter119<sup>+</sup>, CD3<sup>+</sup>, B220<sup>+</sup> and CD11b<sup>+</sup> representing the erythroid, lymphoid and myeloid lineages respectively. (A) E2F single knockout mice. (B) E2F double knockout mice.

### Fig S-2. Ablation of *E2f1-3* after BM transplant leads to reduction in myeloid population.

(A) Schematic diagram of experimental design. Bone marrow from *E2f1<sup>-/-</sup>2<sup>-/-</sup>3<sup>fl/fl</sup>* and *Mx-Cre;E2f1<sup>-/-</sup>2<sup>-/-</sup>3<sup>fl/fl</sup>* mice was transplanted into wild type mice and 5 weeks post-transplant mice were injected with pIpC. (B) FACS profile of bone marrow cells isolated from *E2f1<sup>-/-</sup>2<sup>-/-</sup>3<sup>fl/fl</sup>* (control) and *Mx-Cre;E2f1<sup>-/-</sup>2<sup>-/-</sup>3<sup>fl/fl</sup>* mice. (C) Bone marrow cellularity from the femur of the mice. Values are mean ± SD (p<0.004). (D) Total number of Cd11b<sup>+</sup> and Gr-1<sup>+</sup> cells isolated from BM. Values are mean ± SD (p<0.0006). (E) The percentage of apoptotic cells in BM co-stained with myeloid marker Cd11b. (F) Flow diagram depicting the hematopoietic lineages in BM. Lineages affected by the ablation of *E2f1-3* are shown in red.

### Fig S-3. ChIP assay to confirm the genes involved in G<sub>1</sub>/S and G<sub>2</sub>/M regulation are direct targets of E2f3.

CD11b<sup>+</sup> myeloid cells isolated from BM of mice were subjected to ChIP assays using E2F3 antibody. (A&B) E2F3 recruitment on promoters of G<sub>1</sub>/S and G<sub>2</sub>/M targets in wild type myeloid cells. (C&D) ChIP assay performed in *E2f3a<sup>-/-</sup>* and *E2f3b<sup>-/-</sup>* myeloid cells to show E2F3 loading on promoters of G<sub>1</sub>/S and G<sub>2</sub>/M genes. (E) RT-PCR to measure the expression of *E2f4-8* in *E2f1<sup>-/-</sup>* (open bars) and *Mx-cre;E2f1<sup>-/-</sup>E2f2<sup>-/-</sup>E2f3<sup>fl/fl</sup>* (closed bars) in myeloid cells.

### Figure S-4. c-Myc regulates the expression of *E2f1-3*.

(A) *c-Myc* PCR genotyping on genomic DNA isolated from the control and *cre*-infected *c-Myc<sup>fl/fl</sup>*-BMM. (B) BrdU incorporation in serum (red bars), and CSF-1 (blue bars) stimulated *c-Myc<sup>fl/fl</sup>*-CSF1R cells. *c-Myc<sup>fl/fl</sup>*-CSF1R cells infected with either the control- or *cre*- retroviruses were serum starved for 60 hours. Quiescent MEFs were then re-stimulated with media containing serum or CSF-1 and assessed for BrdU incorporation at the indicated time points as described in "Materials and Methods". (C) *c-Myc<sup>fl/fl</sup>*-CSF1R MEFs were transfected with the *E2f3a*-luciferase plasmid, along with thymidine kinase renilla luciferase construct as an internal control. Transfected cells were incubated in low-serum and then stimulated with either serum or CSF-1 and luciferase activity was measured at the indicated time points.

### Figure S-5. *E2f3a* can rescue the proliferation defect in *c-Myc* deleted cells. The *c-Myc<sup>fl/fl</sup>*-

*CSF-1R* cell were infected with vector alone or *E2f3a*-expressing retroviruses and then with either vector alone (red) or *cre*-expressing retroviruses (blue), selected for hygromycin and puromycin resistance, and used in the following assays. (A) BrdU incorporation of *c-Myc<sup>fl/fl</sup>*-*CSF-1R* cell line. Cells were synchronized by serum starvation, stimulated by addition of CSF-1. Cells were incubated with BrdU for 2 hours and then fixed and stained at the indicated time points. A total of 500 DAPI-stained nuclei from each cell line were counted, and the percent positive for BrdU incorporation is shown. (B) *c-Myc* PCR genotyping of the population of cells from the experiment described above showing efficient deletion of *c-Myc*. The floxed allele (*c-Myc<sup>fl/fl</sup>*) produces a 450-bp PCR fragment, and the knockout *c-Myc<sup>-/-</sup>* allele produces a 300-bp fragment. (C) Cells from the experiment described above were also tested for their long-term growth potential by colony formation assay. Values shown have been corrected for deletion of *c-Myc* by colony PCR. (D) *c-Myc* PCR genotyping on genomic DNA from the *cre*-infected *c-Myc<sup>fl/fl</sup>*-CSF-1R colonies.

**Figure S-6. List of primers used for RT- PCR, ChIP assay and genotyping.**

**Supplementary Table- I.** List of E2F targets upregulated and downregulated in *Mx-cre;E2f1<sup>-/-</sup>E2f2<sup>-/-</sup>E2f3<sup>fl/fl</sup>* myeloid cells.

**Supplementary Table- II.** List of genes upregulated and downregulated in *Mx-cre; E2f1<sup>-/-</sup>E2f2<sup>-/-</sup>E2f3<sup>fl/fl</sup>* myeloid cells (p<0.001).

A

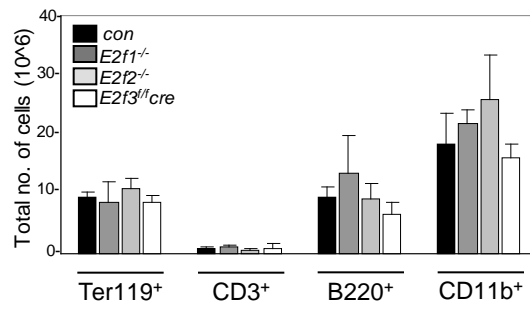

B

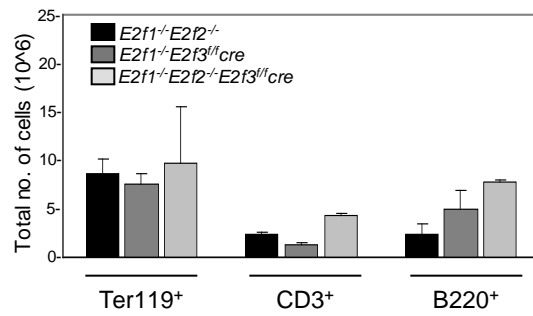

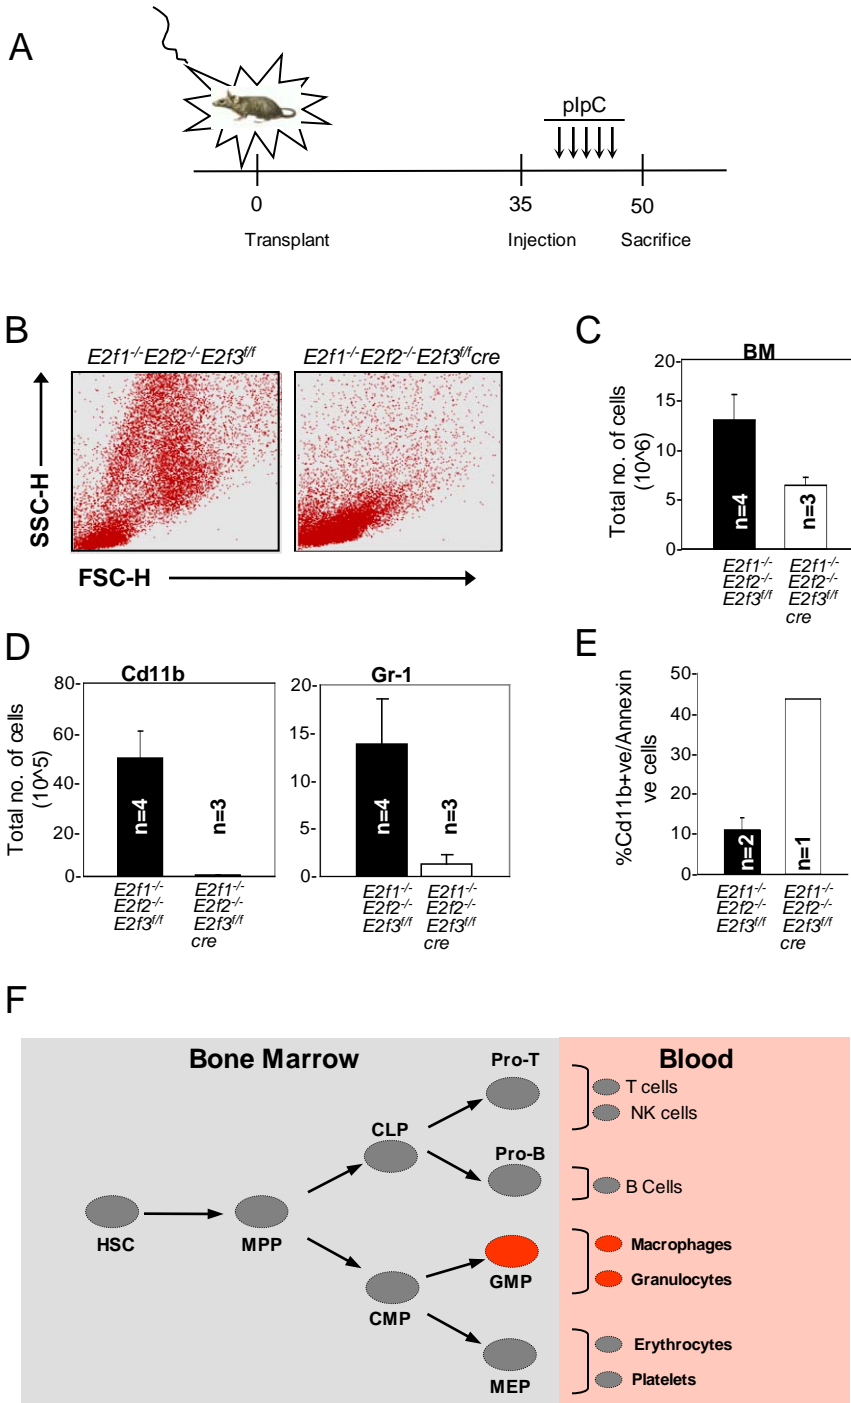

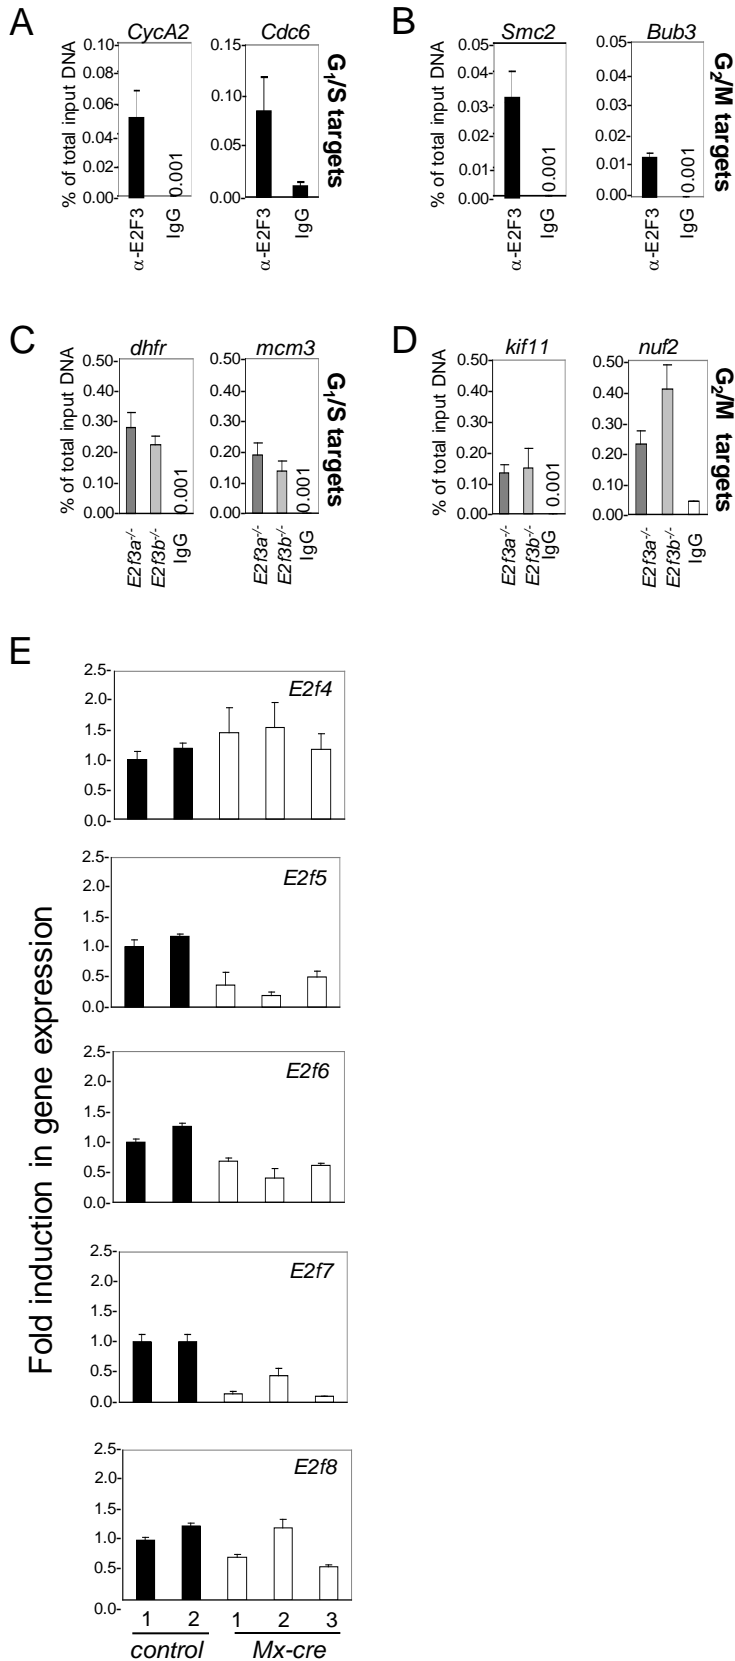

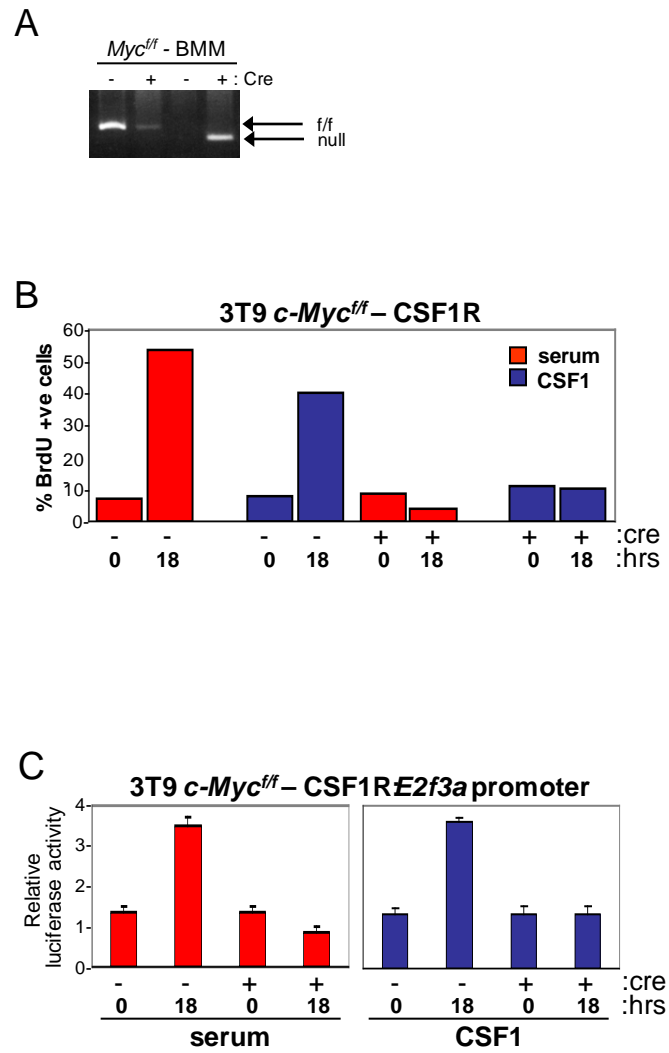

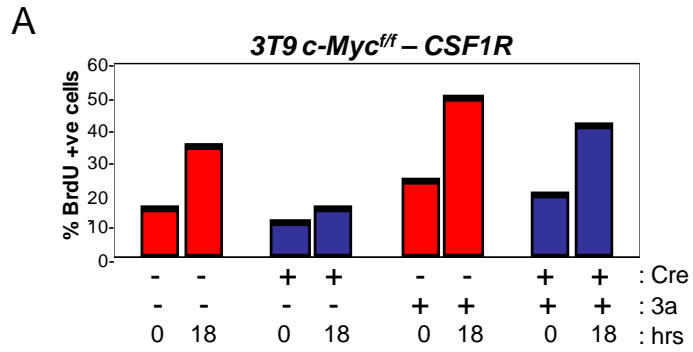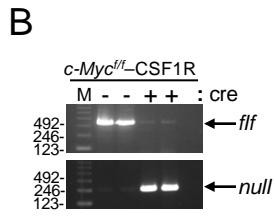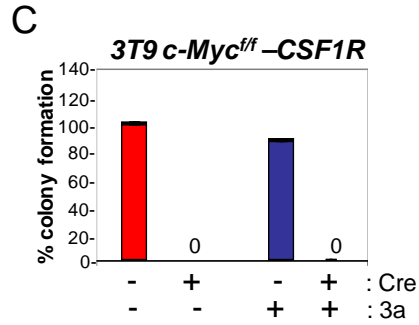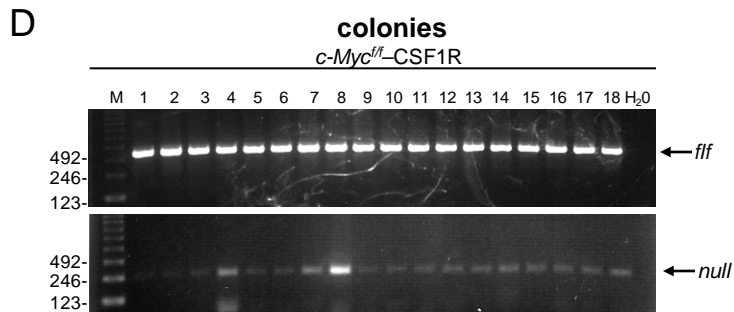

| Gene              | Sense primer(s)                                    | Antisense primer(s)                                  |
|-------------------|----------------------------------------------------|------------------------------------------------------|
| <b>RT-PCR</b>     |                                                    |                                                      |
| <i>Mcm3</i>       | CGCAGGAAGAATGAAAAGAGGG                             | CTGAGGAAGCAGGAAGTGAGAGTC                             |
| <i>Cdc6</i>       | AGTTCTGTGCCCCGCAAAGTG                              | AGCAGCAAAGAGCAAACCAGG                                |
| <i>Cdt1</i>       | TATGGAGGTGGTCTGTGCAA                               | GGCAAGGAGCTCAAAGTCAC                                 |
| <i>Nuf2</i>       | TTGGACGCTCGGTTTTTAAC                               | TCGGATTTGGAAGAAAATCG                                 |
| <i>Nusap1</i>     | GAGCAAGCTGAGACGGAATC                               | CTGTATCCCTGGGGTCTTGA                                 |
| <i>CcnF</i>       | TGAAGCAGAGGTTGAGGAT                                | TCTGTCCTCCTGAAGGCTGT                                 |
| <b>ChIP :</b>     |                                                    |                                                      |
| <i>Dtl</i>        | CAGCACCGCCATCTTCTC                                 | AACTCCCGCCACTAAGAGC                                  |
| <i>Mcm3</i>       | ATAACGCGTCTCTGCTCCAT                               | CACCTCGTCATCCAGGAAGT                                 |
| <i>Cdc6</i>       | TGATGAGTGACAACATAATCAG                             | GAGCTTTGCACTCTTCAGG                                  |
| <i>Cyc A2</i>     | TGTAAGATTCGCGTGGGCCTTC                             | AGGCGGGAGGAGCGTAGAGCC                                |
| <i>Dhfr</i>       | CGGCAATCCTAGGGTGAAGGCTGGT                          | GGCTCCATTGAGCGACGAAAGGTGC                            |
| <i>Bub3</i>       | AGGAGAAGGATGTCACAAGAGC                             | ATTTTCCGAGTCATCCTGT                                  |
| <i>Kif11</i>      | GGAATCGTTGCTGATTTTCG                               | TTACCTGCATCTCACCACCA                                 |
| <i>Smc2</i>       | TCCTTAGGGCAAAGAGGAA                                | GGGCAAAGAGCAGCACTAC                                  |
| <i>Nuf2</i>       | AGGGGCTAGAAACCGTCTGT                               | CCGAGAAGGCTCAGAAGACC                                 |
| <b>Genotype :</b> |                                                    |                                                      |
| <i>E2f1</i>       | AGAAGTCACGCTATGAAACCTCAC<br>AGTGCCAGCGGGGCTGCTAAAG | AGCCACTGGATATGATTCTTGGAC                             |
| <i>E2f2</i>       | CCTGAGCGAGTCGGAGGATGG<br>ACCAAAGAACGGAGCCGGTTGGCG  | GCCCCTAACACATGCACCCATTGG                             |
| <i>E2f3</i>       | TGTGAATAATTTTTGGCATGTTTT                           | AAGGGAAGGGAAAATTAATCTGA<br>CTTATTCTGAGTGTGGACATACCG  |
| <i>c-Myc</i>      | CACCGCTACATCCTGTCCATTC                             | TACAGTCCCAAAGCCCCAGCCAAG<br>AATTTAAGCCTGACCCCCGCGGCA |
| <i>Mx-Cre</i>     | CTGCATTACCGGTGCGATGCAAC                            | GCATTGCTGTCACTTGGTCTGTG                              |



### Supplementary Table-1

#### Upregulated Genes :

| <b>Gene symbol</b> | <b>Description</b>                                                                               | <b>Function</b>   | <b>Ref</b> |
|--------------------|--------------------------------------------------------------------------------------------------|-------------------|------------|
| Mcm5               | minichromosome maintenance deficient 5, cell division cycle 46 ( <i>S. cerevisiae</i> )          | S                 | (1,2)      |
| Mcm7               | minichromosome maintenance deficient 7 ( <i>S. cerevisiae</i> )                                  | S                 | (2)        |
| Mcm4               | minichromosome maintenance deficient 4 homolog ( <i>S. cerevisiae</i> )                          | S                 | (2)        |
| Mcm6               | minichromosome maintenance deficient 6 (MIS5 homolog, <i>S. pombe</i> ) ( <i>S. cerevisiae</i> ) | S                 | (3)        |
| Rpa2               | replication protein A2                                                                           | S                 | (4)        |
| Lig1               | ligase I, DNA, ATP-dependent                                                                     | S                 | (5)        |
| Cdc6               | cell division cycle 6 homolog ( <i>S. cerevisiae</i> )                                           | S                 | (6)        |
| Rfc2               | replication factor C (activator 1) 2                                                             | S                 | (7)        |
| Fen1               | flap structure specific endonuclease 1                                                           | S                 | (8)        |
| Rad51              | RAD51 homolog ( <i>S. cerevisiae</i> )                                                           | S                 | (9)        |
| Orc11              | origin recognition complex, subunit 1-like ( <i>S. cerevisiae</i> )                              | S                 | (10)       |
| Chaf1b             | chromatin assembly factor 1, subunit B (p60)                                                     | S                 | (11)       |
| Cdt1               | chromatin licensing and DNA replication factor 1                                                 | S                 | (12)       |
| Mcm3               | minichromosome maintenance deficient 3 ( <i>S. cerevisiae</i> )                                  | S                 | (13)       |
| Dtl                | denticleless homolog ( <i>Drosophila</i> )                                                       | S                 | (14)       |
| Mcm2               | minichromosome maintenance deficient 2 mitotin ( <i>S. cerevisiae</i> )                          | S                 | (15)       |
| Pola2              | polymerase (DNA directed), alpha 2                                                               | S                 | (16)       |
| Rad54l             | RAD54 like ( <i>S. cerevisiae</i> )                                                              | S                 | (17)       |
| Gins1              | GIN5 complex subunit 1 (Psf1 homolog)                                                            | S                 | (18)       |
| Rpa1               | replication protein A1                                                                           | S                 | (19)       |
| E2f1               | E2F transcription factor 1                                                                       | G <sub>1</sub> /S | (20)       |
| Cdkn1a             | cyclin-dependent kinase inhibitor 1A (P21)                                                       | G <sub>1</sub> /S | (21)       |
| Ddb2               | damage specific DNA binding protein 2                                                            | G <sub>1</sub> /S | (22)       |
| Chek1              | checkpoint kinase 1 homolog ( <i>S. pombe</i> )                                                  | G <sub>1</sub> /S | (23)       |
| Shmt1              | serine hydroxymethyltransferase 1 (soluble)                                                      | G <sub>1</sub> /S | (24)       |
| Dhfr               | dihydrofolate reductase                                                                          | G <sub>1</sub> /S | (25)       |
| Cdca7              | cell division cycle associated 7                                                                 | Others            | (26)       |
| Prkcbp1            | protein kinase C binding protein 1                                                               | Others            | (27)       |
| Cenph              | centromere protein H                                                                             | Others            | (28)       |
| Pnpo               | pyridoxine 5'-phosphate oxidase                                                                  | Others            | (29)       |
| Mthfd1             | methylenetetrahydrofolate dehydrogenase (NADP+ dependent), methenyltetrahydrofolate              | Others            | (30)       |

|         |                                                                                |        |      |
|---------|--------------------------------------------------------------------------------|--------|------|
|         | cyclohydrolase, formyltetrahydrofolate synthase                                |        |      |
| Elov13  | elongation of very long chain fatty acids (FEN1/Elo2, SUR4/Elo3, yeast)-like 3 | Others | (31) |
| Mybbp1a | MYB binding protein (P160) 1a                                                  | Others | (32) |
| Isg2011 | interferon stimulated exonuclease gene 20-like 1                               | Others | (33) |
| Usp37   | ubiquitin specific peptidase 37                                                | Others | (34) |
| Gls2    | glutaminase 2 (liver, mitochondrial)                                           | Others | (35) |
| Trim37  | tripartite motif protein 37                                                    | Others | (36) |
| Ssbp4   | single stranded DNA binding protein 4                                          | Others | (37) |
| Dcp2    | DCP2 decapping enzyme homolog ( <i>S. cerevisiae</i> )                         | Others | (38) |
| Gtf2f2  | general transcription factor IIF, polypeptide 2                                | Others | (39) |
| Ung     | uracil DNA glycosylase                                                         | Others | (40) |
| Pold1   | polymerase (DNA directed), delta 1, catalytic subunit                          | Others | (41) |
| Syce2   | synaptonemal complex central element protein 2                                 | Others | (42) |
| Fancg   | Fanconi anemia, complementation group G                                        | Others | (43) |
| Rad5111 | RAD51-like 1 ( <i>S. cerevisiae</i> )                                          | Others | (44) |

**Downregulated Genes :**

| <b>Gene symbol</b> | <b>Description</b>                                                           | <b>Function</b>   | <b>Ref</b> |
|--------------------|------------------------------------------------------------------------------|-------------------|------------|
| Nusap1             | nucleolar and spindle associated protein 1                                   | G <sub>2</sub> /M | (45)       |
| H2afx              | H2A histone family, member X                                                 | G <sub>2</sub> /M | (46)       |
| Spc25              | SPC25, NDC80 kinetochore complex component, homolog ( <i>S. cerevisiae</i> ) | G <sub>2</sub> /M | (47)       |
| Sgol1              | shugoshin-like 1 ( <i>S. pombe</i> )                                         | G <sub>2</sub> /M | (48)       |
| Ncaph              | non-SMC condensin I complex, subunit H                                       | G <sub>2</sub> /M | (49)       |
| Ccnf               | cyclin F                                                                     | G <sub>2</sub> /M | (50)       |
| Aspm               | Asp (abnormal spindle)-like, microcephaly associated ( <i>Drosophila</i> )   | G <sub>2</sub> /M | (51)       |
| Prc1               | protein regulator of cytokinesis 1                                           | G <sub>2</sub> /M | (52)       |
| Mki67              | antigen identified by monoclonal antibody Ki 67                              | G <sub>2</sub> /M | (53)       |
| Cenpf              | centromere protein F                                                         | G <sub>2</sub> /M | (54)       |
| Cenpl              | centromere protein L                                                         | G <sub>2</sub> /M | (55)       |
| Fbxo5              | F-box protein 5                                                              | G <sub>2</sub> /M | (56)       |
| Smc2               | structural maintenance of chromosomes 2                                      | G <sub>2</sub> /M | (57)       |
| Nuf2               | NUF2, NDC80 kinetochore complex component, homolog ( <i>S. cerevisiae</i> )  | G <sub>2</sub> /M | (58)       |
| Kif 11             | kinesin family member 11                                                     | G <sub>2</sub> /M | (59)       |
| Skp2               | S-phase kinase-associated protein 2 (p45)                                    | G <sub>2</sub> /M | (60)       |
| Kif2c              | kinesin family member 2C                                                     | G <sub>2</sub> /M | (61)       |
| Ndc80              | NDC80 homolog, kinetochore complex component ( <i>S. cerevisiae</i> )        | G <sub>2</sub> /M | (62)       |
| Cenpe              | centromere protein E                                                         | G <sub>2</sub> /M | (63)       |
| Cenpc1             | centromere protein C1                                                        | G <sub>2</sub> /M | (64)       |
| Pbk                | PDZ binding kinase                                                           | G <sub>2</sub> /M | (65)       |
| Kif20a             | kinesin family member 20A                                                    | G <sub>2</sub> /M | (66)       |
| Cks2               | CDC28 protein kinase regulatory subunit 2                                    | G <sub>2</sub> /M | (67)       |
| Bub3               | budding uninhibited by benzimidazoles 3 homolog ( <i>S. cerevisiae</i> )     | G <sub>2</sub> /M | (68)       |
| Stag3              | stromal antigen 3                                                            | G <sub>2</sub> /M | (69)       |
| Lmnb1              | lamin B1                                                                     | G <sub>2</sub> /M | (70)       |
| Esco2              | establishment of cohesion 1 homolog 2 ( <i>S. cerevisiae</i> )               | G <sub>2</sub> /M | (71)       |
| Cdkn2c             | cyclin-dependent kinase inhibitor 2C (p18, inhibits CDK4)                    | G <sub>2</sub> /M | (72)       |
| Ccng2              | cyclin G2                                                                    | G <sub>2</sub> /M | (73)       |
| Tyms               | Thymidylate synthase                                                         | G <sub>1</sub> /S | (74)       |
| Ccne2              | cyclin E2                                                                    | G <sub>1</sub> /S | (75)       |
| Ccna2              | cyclin A2                                                                    | G <sub>1</sub> /S | (76)       |
| Tk2                | thymidine kinase 2, mitochondrial                                            | G <sub>1</sub> /S | (77)       |
| Gspt2              | G1 to S phase transition 2                                                   | G <sub>1</sub> /S | (78)       |

|            |                                                                                 |        |       |
|------------|---------------------------------------------------------------------------------|--------|-------|
| Sp1        | trans-acting transcription factor 1                                             | Others | (79)  |
| Ier5       | immediate early response 5                                                      | Others | (80)  |
| E2f2       | E2F transcription factor 2                                                      | Others | (81)  |
| Phc1       | polyhomeotic-like 1 (Drosophila)                                                | Others | (82)  |
| Junb       | Jun-B oncogene                                                                  | Others | (83)  |
| Dbp        | D site albumin promoter binding protein                                         | Others | (84)  |
| Syk        | spleen tyrosine kinase                                                          | Others | (85)  |
| Serbp1     | Serpine1 mRNA binding protein 1                                                 | Others | (86)  |
| Calm2      | calmodulin 2                                                                    | Others | (87)  |
| Ube2t      | ubiquitin-conjugating enzyme E2T<br>(putative)                                  | Others | (88)  |
| Eps8       | epidermal growth factor receptor pathway<br>substrate 8                         | Others | (89)  |
| Tcf19      | transcription factor 19                                                         | Others | (90)  |
| Sfrs7      | splicing factor, arginine/serine-rich 7                                         | Others | (91)  |
| Depdc1a    | DEP domain containing 1a                                                        | Others | (92)  |
| Cklf       | chemokine-like factor                                                           | Others | (93)  |
| Brd8       | bromodomain containing 8                                                        | Others | (94)  |
| Dleu2      | deleted in lymphocytic leukemia, 2                                              | Others | (95)  |
| H2afv      | H2A histone family, member V                                                    | Others | (96)  |
| Dhx40      | DEAH (Asp-Glu-Ala-His) box<br>polypeptide 40                                    | Others | (97)  |
| Dck        | deoxycytidine kinase                                                            | Others | (23)  |
| Capns2     | calpain, small subunit 2                                                        | Others | (98)  |
| Prr11      | proline rich 11                                                                 | Others | (99)  |
| Top2a      | topoisomerase (DNA) II alpha                                                    | Others | (100) |
| Letm2      | leucine zipper-EF-hand containing<br>transmembrane protein 2                    | Others | (101) |
| Dctn4      | dynactin 4                                                                      | Others | (102) |
| Mrp63      | mitochondrial ribosomal protein 63                                              | Others | (103) |
| Rnf167     | ring finger protein 167                                                         | Others | (99)  |
| Id3        | inhibitor of DNA binding 3                                                      | Others | (104) |
| Mycn       | v-myc myelocytomatosis viral related<br>oncogene, neuroblastoma derived (avian) | Others | (105) |
| Apoe       | apolipoprotein E                                                                | Others | (106) |
| Sft2d3     | SFT2 domain containing 3                                                        | Others | (107) |
| Dbp        | D site albumin promoter binding protein                                         | Others | (108) |
| Hist2h2aa2 | histone cluster 2, H2aa2                                                        | Others | (109) |
| Hist3h2a   | histone cluster 3, H2a                                                          | Others | (110) |
| Hist1h1e   | histone cluster 1, H1e                                                          | Others | (111) |
| Asf1b      | ASF1 anti-silencing function 1 homolog<br>B ( <i>S. cerevisiae</i> )            | Others | (112) |

## References:

1. Ferguson, R., and Maller, J. (2008) *J Cell Sci* **121**, 3224-3232
2. You, Z., and Masai, H. (2005) *Nucleic Acids Res* **33**, 3033-3047
3. You, Z., Komamura, Y., and Ishimi, Y. (1999) *Mol Cell Biol* **19**, 8003-8015
4. Manthey, K., Opiyo, S., Glanzer, J., Dimitrova, D., Elliott, J., and Oakley, G. (2007) *J Cell Sci* **120**, 4221-4229
5. Bentley, D., Harrison, C., Ketchen, A., Redhead, N., Samuel, K., Waterfall, M., Ansell, J., and Melton, D. (2002) *J Cell Sci* **115**, 1551-1561
6. Boronat, S., and Campbell, J. (2008) *Cell Cycle* **7**, 597-601
7. Tomida, J., Masuda, Y., Hiroaki, H., Ishikawa, T., Song, I., Tsurimoto, T., Tateishi, S., Shiomi, T., Kamei, Y., Kim, J., Kamiya, K., Vaziri, C., Ohmori, H., and Todo, T. (2008) *J Biol Chem* **283**, 9071-9079
8. Larsen, E., Gran, C., Saether, B., Seeberg, E., and Klungland, A. (2003) *Mol Cell Biol* **23**, 5346-5353
9. Wray, J., Liu, J., Nickoloff, J., and Shen, Z. (2008) *Cancer Res* **68**, 2699-2707
10. Bowers, J., Randell, J., Chen, S., and Bell, S. (2004) *Mol Cell* **16**, 967-978
11. Takami, Y., Ono, T., Fukagawa, T., Shibahara, K., and Nakayama, T. (2007) *Mol Biol Cell* **18**, 129-141
12. Lutzmann, M., and Méchali, M. (2008) *Mol Cell* **31**, 190-200
13. Lin, D., Aggarwal, P., and Diehl, J. (2008) *Proc Natl Acad Sci U S A* **105**, 8079-8084
14. Sansam, C., Shepard, J., Lai, K., Ianari, A., Danielian, P., Amsterdam, A., Hopkins, N., and Lees, J. (2006) *Genes Dev* **20**, 3117-3129
15. Bochman, M., and Schwacha, A. (2008) *Mol Cell* **31**, 287-293
16. Mizuno, T., Yamagishi, K., Miyazawa, H., and Hanaoka, F. (1999) *Mol Cell Biol* **19**, 7886-7896
17. Mills, K., Ferguson, D., Essers, J., Eckersdorff, M., Kanaar, R., and Alt, F. (2004) *Genes Dev* **18**, 1283-1292
18. Chang, Y., Wang, G., Bermudez, V., Hurwitz, J., and Chen, X. (2007) *Proc Natl Acad Sci U S A* **104**, 12685-12690
19. Liu, J., Kuo, S., and Melendy, T. (2006) *J Cell Biochem* **99**, 1452-1462
20. Field, S., Tsai, F., Kuo, F., Zubiaga, A., Kaelin, W. J., Livingston, D., Orkin, S., and Greenberg, M. (1996) *Cell* **85**, 549-561
21. Cheng, T., Rodrigues, N., Shen, H., Yang, Y., Dombkowski, D., Sykes, M., and Scadden, D. (2000) *Science* **287**, 1804-1808
22. Prost, S., Lu, P., Caldwell, H., and Harrison, D. (2007) *Oncogene* **26**, 3572-3581
23. Shimada, M., Niida, H., Zineldeen, D., Tagami, H., Tanaka, M., Saito, H., and Nakanishi, M. (2008) *Cell* **132**, 221-232
24. Woeller, C., Anderson, D., Szebenyi, D., and Stover, P. (2007) *J Biol Chem* **282**, 17623-17631
25. Nicolas, E., Roumillac, C., and Trouche, D. (2003) *Mol Cell Biol* **23**, 1614-1622
26. Osthus, R., Karim, B., Prescott, J., Smith, B., McDevitt, M., Huso, D., and Dang, C. (2005) *Cancer Res* **65**, 5620-5627
27. Fossey, S., Kuroda, S., Price, J., Pendleton, J., Freedman, B., and Bowden, D. (2000) *Mamm Genome* **11**, 919-925

28. Fukagawa, T., Mikami, Y., Nishihashi, A., Regnier, V., Haraguchi, T., Hiraoka, Y., Sugata, N., Todokoro, K., Brown, W., and Ikemura, T. (2001) *EMBO J* **20**, 4603-4617
29. Khayat, M., Korman, S., Frankel, P., Weintraub, Z., Herschcowitz, S., Sheffer, V., Ben Elisha, M., Wevers, R., and Falik-Zaccai, T. (2008) *Mol Genet Metab* **94**, 431-434
30. Christensen, K., Rohlicek, C., Andelfinger, G., Michaud, J., Bigras, J., Richter, A., Mackenzie, R., and Rozen, R. (2009) *Hum Mutat* **30**, 212-220
31. Brolinson, A., Fourcade, S., Jakobsson, A., Pujol, A., and Jacobsson, A. (2008) *Endocrinology* **149**, 3158-3166
32. Yamauchi, T., Keough, R., Gonda, T., and Ishii, S. (2008) *Genes Cells* **13**, 27-39
33. Kawase, T., Ichikawa, H., Ohta, T., Nozaki, N., Tashiro, F., Ohki, R., and Taya, Y. (2008) *Oncogene* **27**, 3797-3810
34. Hochstrasser, M. (2009) *Nature* **458**, 422-429
35. Squires, S., Ewart, H., McCarthy, C., Brosnan, M., and Brosnan, J. (1997) *Diabetes* **46**, 1945-1949
36. Kallijärvi, J., Avela, K., Lipsanen-Nyman, M., Ulmanen, I., and Lehesjoki, A. (2002) *Am J Hum Genet* **70**, 1215-1228
37. Castro, P., Liang, H., Liang, J., and Nagarajan, L. (2002) *Genomics* **80**, 78-85
38. Floor, S., Jones, B., and Gross, J. *RNA Biol* **5**, 189-192
39. Purrello, M., Di Pietro, C., Rapisarda, A., Mirabile, E., Motta, S., Sichel, G., and Grzeschik, K. (1995) *Cytogenet Cell Genet* **69**, 75-80
40. Begum, N., Kinoshita, K., Kakazu, N., Muramatsu, M., Nagaoka, H., Shinkura, R., Biniszkiwicz, D., Boyer, L., Jaenisch, R., and Honjo, T. (2004) *Science* **305**, 1160-1163
41. Venkatesan, R., Treuting, P., Fuller, E., Goldsby, R., Norwood, T., Gooley, T., Ladiges, W., Preston, B., and Loeb, L. (2007) *Mol Cell Biol* **27**, 7669-7682
42. Bolcun-Filas, E., Costa, Y., Speed, R., Taggart, M., Benavente, R., De Rooij, D., and Cooke, H. (2007) *J Cell Biol* **176**, 741-747
43. Yamamoto, K., Ishiai, M., Matsushita, N., Arakawa, H., Lamerdin, J., Buerstedde, J., Tanimoto, M., Harada, M., Thompson, L., and Takata, M. (2003) *Mol Cell Biol* **23**, 5421-5430
44. Sellick, G., Fielding, S., Qureshi, M., Catovsky, D., and Houlston, R. (2008) *Leuk Lymphoma* **49**, 130-133
45. Ribbeck, K., Groen, A., Santarella, R., Bohnsack, M., Raemaekers, T., Köcher, T., Gentzel, M., Görlich, D., Wilm, M., Carmeliet, G., Mitchison, T., Ellenberg, J., Hoenger, A., and Mattaj, I. (2006) *Mol Biol Cell* **17**, 2646-2660
46. Kinner, A., Wu, W., Staudt, C., and Iliakis, G. (2008) *Nucleic Acids Res* **36**, 5678-5694
47. McClelland, M., Kallio, M., Barrett-Wilt, G., Kestner, C., Shabanowitz, J., Hunt, D., Gorbsky, G., and Stukenberg, P. (2004) *Curr Biol* **14**, 131-137
48. Wang, X., Yang, Y., Duan, Q., Jiang, N., Huang, Y., Darzynkiewicz, Z., and Dai, W. (2008) *Dev Cell* **14**, 331-341
49. Schmiesing, J., Ball, A. J., Gregson, H., Alderton, J., Zhou, S., and Yokomori, K. (1998) *Proc Natl Acad Sci U S A* **95**, 12906-12911

50. Kong, M., Barnes, E., Ollendorff, V., and Donoghue, D. (2000) *EMBO J* **19**, 1378-1388
51. Kouprina, N., Pavlicek, A., Collins, N., Nakano, M., Noskov, V., Ohzeki, J., Mochida, G., Risinger, J., Goldsmith, P., Gunsior, M., Solomon, G., Gersch, W., Kim, J., Barrett, J., Walsh, C., Jurka, J., Masumoto, H., and Larionov, V. (2005) *Hum Mol Genet* **14**, 2155-2165
52. Zhu, C., Lau, E., Schwarzenbacher, R., Bossy-Wetzel, E., and Jiang, W. (2006) *Proc Natl Acad Sci U S A* **103**, 6196-6201
53. Kim, Y., Ketter, R., Steudel, W., and Feiden, W. (2007) *Am J Clin Pathol* **128**, 118-125
54. Evans, H., Edwards, L., and Goodwin, R. (2007) *Exp Cell Res* **313**, 2427-2437
55. Gieni, R., Chan, G., and Hendzel, M. (2008) *J Cell Biochem* **104**, 2027-2039
56. Di Fiore, B., and Pines, J. (2007) *J Cell Biol* **177**, 425-437
57. Losada, A., Hirano, M., and Hirano, T. (2002) *Genes Dev* **16**, 3004-3016
58. Mikami, Y., Hori, T., Kimura, H., and Fukagawa, T. (2005) *Mol Cell Biol* **25**, 1958-1970
59. Castillo, A., Morse, H. r., Godfrey, V., Naeem, R., and Justice, M. (2007) *Cancer Res* **67**, 10138-10147
60. Nakayama, K., Nagahama, H., Minamishima, Y., Miyake, S., Ishida, N., Hatakeyama, S., Kitagawa, M., Iemura, S., Natsume, T., and Nakayama, K. (2004) *Dev Cell* **6**, 661-672
61. Shimo, A., Tanikawa, C., Nishidate, T., Lin, M., Matsuda, K., Park, J., Ueki, T., Ohta, T., Hirata, K., Fukuda, M., Nakamura, Y., and Katagiri, T. (2008) *Cancer Sci* **99**, 62-70
62. Williams, B., Leung, G., Maiato, H., Wong, A., Li, Z., Williams, E., Kirkpatrick, C., Aquadro, C., Rieder, C., and Goldberg, M. (2007) *J Cell Sci* **120**, 3522-3533
63. Putkey, F., Cramer, T., Mophew, M., Silk, A., Johnson, R., McIntosh, J., and Cleveland, D. (2002) *Dev Cell* **3**, 351-365
64. Wong, L., Brettingham-Moore, K., Chan, L., Quach, J., Anderson, M., Northrop, E., Hannan, R., Saffery, R., Shaw, M., Williams, E., and Choo, K. (2007) *Genome Res* **17**, 1146-1160
65. Abe, Y., Takeuchi, T., Kagawa-Miki, L., Ueda, N., Shigemoto, K., Yasukawa, M., and Kito, K. (2007) *J Mol Biol* **370**, 231-245
66. Hill, E., Clarke, M., and Barr, F. (2000) *EMBO J* **19**, 5711-5719
67. Spruck, C., de Miguel, M., Smith, A., Ryan, A., Stein, P., Schultz, R., Lincoln, A., Donovan, P., and Reed, S. (2003) *Science* **300**, 647-650
68. Tange, Y., and Niwa, O. (2008) *Genetics* **179**, 785-792
69. Storre, J., Schäfer, A., Reichert, N., Barbero, J., Hauser, S., Eilers, M., and Gaubatz, S. (2005) *J Biol Chem* **280**, 41380-41386
70. Vergnes, L., Péterfy, M., Bergo, M., Young, S., and Reue, K. (2004) *Proc Natl Acad Sci U S A* **101**, 10428-10433
71. Vega, H., Waisfisz, Q., Gordillo, M., Sakai, N., Yanagihara, I., Yamada, M., van Gosliga, D., Kayserili, H., Xu, C., Ozono, K., Jabs, E., Inui, K., and Joenje, H. (2005) *Nat Genet* **37**, 468-470
72. Myers, T., Andreuzza, S., and Franklin, D. (2004) *Exp Cell Res* **300**, 365-378

73. Martínez-Gac, L., Marqués, M., García, Z., Campanero, M., and Carrera, A. (2004) *Mol Cell Biol* **24**, 2181-2189
74. Le François, B., Maroun, J., and Birnboim, H. (2007) *Br J Cancer* **97**, 1242-1250
75. Geng, Y., Lee, Y., Welcker, M., Swanger, J., Zagozdzon, A., Winer, J., Roberts, J., Kaldis, P., Clurman, B., and Sicinski, P. (2007) *Mol Cell* **25**, 127-139
76. Farràs, R., Baldin, V., Gallach, S., Acquaviva, C., Bossis, G., Jariel-Encontre, I., and Piechaczyk, M. (2008) *Mol Cell Biol* **28**, 4173-4187
77. Akman, H., Dorado, B., López, L., García-Cazorla, A., Vilà, M., Tanabe, L., Dauer, W., Bonilla, E., Tanji, K., and Hirano, M. (2008) *Hum Mol Genet* **17**, 2433-2440
78. Hoshino, S., Imai, M., Mizutani, M., Kikuchi, Y., Hanaoka, F., Ui, M., and Katada, T. (1998) *J Biol Chem* **273**, 22254-22259
79. Banchio, C., Schang, L., and Vance, D. (2004) *J Biol Chem* **279**, 40220-40226
80. Williams, M., Lyu, M., Yang, Y., Lin, E., Dunbrack, R., Birren, B., Cunningham, J., and Hunter, K. (1999) *Genomics* **55**, 327-334
81. Scheijen, B., Bronk, M., van der Meer, T., De Jong, D., and Bernards, R. (2004) *J Biol Chem* **279**, 10476-10483
82. Ohtsubo, M., Yasunaga, S., Ohno, Y., Tsumura, M., Okada, S., Ishikawa, N., Shirao, K., Kikuchi, A., Nishitani, H., Kobayashi, M., and Takihara, Y. (2008) *Proc Natl Acad Sci U S A* **105**, 10396-10401
83. Bakiri, L., Lallemand, D., Bossy-Wetzler, E., and Yaniv, M. (2000) *EMBO J* **19**, 2056-2068
84. Gachon, F., Olela, F., Schaad, O., Descombes, P., and Schibler, U. (2006) *Cell Metab* **4**, 25-36
85. Kawakami, Y., Kitaura, J., Yao, L., McHenry, R., Newton, A., Kang, S., Kato, R., Leitges, M., Rawlings, D., and Kawakami, T. (2003) *Proc Natl Acad Sci U S A* **100**, 9470-9475
86. Peluso, J., Pappalardo, A., Losel, R., and Wehling, M. (2005) *Biol Reprod* **73**, 261-270
87. Rust, R., Visser, L., van der Leij, J., Harms, G., Blokzijl, T., Deloulme, J., van der Vlies, P., Kamps, W., Kok, K., Lim, M., Poppema, S., and van den Berg, A. (2005) *Br J Haematol* **131**, 596-608
88. Alpi, A., Langevin, F., Mosedale, G., Machida, Y., Dutta, A., and Patel, K. (2007) *Mol Cell Biol* **27**, 8421-8430
89. Roffers-Agarwal, J., Xanthos, J., and Miller, J. (2005) *BMC Cell Biol* **6**, 36
90. Krishnan, B., Jamry, I., and Chaplin, D. (1995) *Genomics* **30**, 53-58
91. Park, E., Han, J., Son, G., Lee, M., Chung, S., Park, S., Park, K., Lee, K., Choi, S., Seong, J., and Kim, K. (2006) *J Biol Chem* **281**, 401-409
92. Kanehira, M., Harada, Y., Takata, R., Shuin, T., Miki, T., Fujioka, T., Nakamura, Y., and Katagiri, T. (2007) *Oncogene* **26**, 6448-6455
93. Wang, Y., Zhang, Y., Han, W., Li, D., Tian, L., Yin, C., and Ma, D. (2008) *Int J Biochem Cell Biol* **40**, 909-919
94. Iwaki, D., and Fujita, T. (2005) *J Endotoxin Res* **11**, 47-50
95. Chung, E., Dews, M., Cozma, D., Yu, D., Wentzel, E., Chang, T., Schelter, J., Cleary, M., Mendell, J., and Thomas-Tikhonenko, A. (2008) *Cancer Biol Ther* **7**



96. Kusch, T., Florens, L., Macdonald, W., Swanson, S., Glaser, R., Yates, J. r., Abmayr, S., Washburn, M., and Workman, J. (2004) *Science* **306**, 2084-2087
97. Xu, J., Wu, H., Zhang, C., Cao, Y., Wang, L., Zeng, L., Ye, X., Wu, Q., Dai, J., Xie, Y., and Mao, Y. (2002) *J Hum Genet* **47**, 681-683
98. Schád, E., Farkas, A., Jékely, G., Tompa, P., and Friedrich, P. (2002) *Biochem J* **362**, 383-388
99. Gerhard, D., Wagner, L., Feingold, E., Shenmen, C., Grouse, L., Schuler, G., Klein, S., Old, S., Rasooly, R., Good, P., Guyer, M., Peck, A., Derge, J., Lipman, D., Collins, F., Jang, W., Sherry, S., Feolo, M., Misquitta, L., Lee, E., Rotmistrovsky, K., Greenhut, S., Schaefer, C., Buetow, K., Bonner, T., Haussler, D., Kent, J., Kiekhaus, M., Furey, T., Brent, M., Prange, C., Schreiber, K., Shapiro, N., Bhat, N., Hopkins, R., Hsie, F., Driscoll, T., Soares, M., Casavant, T., Scheetz, T., Brown-stein, M., Usdin, T., Toshiyuki, S., Carninci, P., Piao, Y., Dudekula, D., Ko, M., Kawakami, K., Suzuki, Y., Sugano, S., Gruber, C., Smith, M., Simmons, B., Moore, T., Waterman, R., Johnson, S., Ruan, Y., Wei, C., Mathavan, S., Gunaratne, P., Wu, J., Garcia, A., Hulyk, S., Fuh, E., Yuan, Y., Sneed, A., Kowis, C., Hodgson, A., Muzny, D., McPherson, J., Gibbs, R., Fahey, J., Helton, E., Ketteman, M., Madan, A., Rodrigues, S., Sanchez, A., Whiting, M., Madari, A., Young, A., Wetherby, K., Granite, S., Kwong, P., Brinkley, C., Pearson, R., Bouffard, G., Blakesly, R., Green, E., Dickson, M., Rodriguez, A., Grimwood, J., Schmutz, J., Myers, R., Butterfield, Y., Griffith, M., Griffith, O., Krzywinski, M., Liao, N., Morin, R., Morrin, R., Palmquist, D., Petrescu, A., Skalska, U., Smailus, D., Stott, J., Schnerch, A., Schein, J., Jones, S., Holt, R., Baross, A., Marra, M., Clifton, S., Makowski, K., Bosak, S., and Malek, J. (2004) *Genome Res* **14**, 2121-2127
100. Solovyan, V., Bezvenyuk, Z., Salminen, A., Austin, C., and Courtney, M. (2002) *J Biol Chem* **277**, 21458-21467
101. Tamai, S., Iida, H., Yokota, S., Sayano, T., Kiguchiya, S., Ishihara, N., Hayashi, J., Mihara, K., and Oka, T. (2008) *J Cell Sci* **121**, 2588-2600
102. Lim, C., Cater, M., Mercer, J., and La Fontaine, S. (2006) *J Biol Chem* **281**, 14006-14014
103. Suzuki, T., Terasaki, M., Takemoto-Hori, C., Hanada, T., Ueda, T., Wada, A., and Watanabe, K. (2001) *J Biol Chem* **276**, 33181-33195
104. Maeda, Y., Tsuji, K., Nifuji, A., and Noda, M. (2004) *J Cell Biochem* **93**, 337-344
105. Kawagoe, H., Kandilci, A., Kranenburg, T., and Grosveld, G. (2007) *Cancer Res* **67**, 10677-10685
106. Kang, J., Albadawi, H., Patel, V., Abbruzzese, T., Yoo, J., Austen, W. J., and Watkins, M. (2008) *J Vasc Surg* **48**, 701-708
107. Feldmann, H., Aigle, M., Aljinovic, G., André, B., Baclet, M., Barthe, C., Baur, A., Bécam, A., Biteau, N., and Boles, E. (1994) *EMBO J* **13**, 5795-5809
108. Ripperger, J., and Schibler, U. (2006) *Nat Genet* **38**, 369-374
109. Nishida, H., Suzuki, T., Tomaru, Y., and Hayashizaki, Y. (2005) *BMC Genet* **6**, 10
110. Marzluff, W., Gongidi, P., Woods, K., Jin, J., and Maltais, L. (2002) *Genomics* **80**, 487-498

111. Fan, Y., Nikitina, T., Morin-Kensicki, E., Zhao, J., Magnuson, T., Woodcock, C., and Skoultchi, A. (2003) *Mol Cell Biol* **23**, 4559-4572
112. Galvani, A., Courbeyrette, R., Agez, M., Ochsenbein, F., Mann, C., and Thuret, J. (2008) *Mol Cell Biol* **28**, 3672-3685
